# Supplementary material for: VisualTE: a graphical interface for transposable element analysis at the genomic scale
Source: PubMed Central journal article supplement (PMC4367877; doi:10.1186/s12864-015-1351-5), 2015-02-27
Supplement: 12864_2015_1351_MOESM2_ESM.pdf [file 12864_2015_1351_MOESM2_ESM.pdf]

| TE Location on Chromosome |       | TE Distribution on Chromosome |       | TE Distribution on Genome |          |           | TE Size Distribution on Genome |             |               | TE-Gen Distance |            | TE-Gen GO |           | All TE-Gen Features |               |          |
|---------------------------|-------|-------------------------------|-------|---------------------------|----------|-----------|--------------------------------|-------------|---------------|-----------------|------------|-----------|-----------|---------------------|---------------|----------|
| Genome                    | Chrom | TE Family                     | Color | TE Start                  | TE End   | Direction | Similarity                     | Superfamily | Gene Dista... | Gene Positi...  | Gene Start | Gene End  | Gene      | Gene Direc...       | GeneOntolo... | Ortholog |
| Arabidopsis               | I     | ATREP1                        |       | 9918887                   | 9918986  | d         | 71                             | HELITRON    | 5050          | 5'              | 9911898    | 9913837   | AT1G28310 | c                   | GO:000367...  | 1        |
| Arabidopsis               | I     | ATREP1                        |       | 9918887                   | 9918986  | d         | 71                             | HELITRON    | 1521          | 3'              | 9920507    | 9924488   | DEG15     | c                   | GO:000367...  | 1        |
| Arabidopsis               | I     | ATREP1                        |       | 11782860                  | 11783036 | c         | 70                             | HELITRON    | 5303          | 5'              | 11776765   | 11777557  | AT1G32570 | d                   | GO:000367...  | 1        |
| Arabidopsis               | I     | ATREP1                        |       | 11782860                  | 11783036 | c         | 70                             | HELITRON    | 1021          | 3'              | 11784057   | 11785637  | AT1G32580 | d                   | GO:000367...  | 1        |
| Arabidopsis               | I     | ATREP1                        |       | 13465359                  | 13465489 | c         | 63                             | HELITRON    | 9028          | 5'              | 13454496   | 13456331  | AT1G36060 | c                   | GO:000367...  | 1        |
| Arabidopsis               | I     | ATREP1                        |       | 13465359                  | 13465489 | c         | 63                             | HELITRON    | 1422          | 3'              | 13466911   | 13470936  | AT1G36070 | c                   | GO:000367...  | 1        |
| Arabidopsis               | I     | ATREP1                        |       | 17707257                  | 17707384 | c         | 68                             | HELITRON    | 797           | 5'              | 17704179   | 17706460  | MYB112    | c                   | GO:000573...  | 1        |
| Arabidopsis               | I     | ATREP1                        |       | 17707257                  | 17707384 | c         | 68                             | HELITRON    | 4107          | 3'              | 17711491   | 17712660  | AT1G48010 | c                   | GO:000367...  | 1        |
| Arabidopsis               | I     | ATREP1                        |       | 18281609                  | 18281759 | c         | 64                             | HELITRON    | 631           | 5'              | 18279600   | 18280978  | AT1G49390 | d                   | GO:000002...  | 1        |
| Arabidopsis               | I     | ATREP1                        |       | 18281609                  | 18281759 | c         | 64                             | HELITRON    | 1273          | 3'              | 18283032   | 18284202  | EMB1129   | d                   | GO:000573...  | 1        |
| Arabidopsis               | I     | ATREP3                        |       | 13465381                  | 13465676 | c         | 68                             | HELITRON    | 9050          | 5'              | 13454496   | 13456331  | AT1G36060 | c                   | GO:000367...  | 1        |
| Arabidopsis               | I     | ATREP3                        |       | 13465381                  | 13465676 | c         | 68                             | HELITRON    | 1235          | 3'              | 13466911   | 13470936  | AT1G36070 | c                   | GO:000367...  | 1        |
| Arabidopsis               | I     | ATREP3                        |       | 16454400                  | 16454520 | d         | 70                             | HELITRON    | 7514          | 5'              | 16443685   | 16446886  | AT1G43650 | c                   | GO:000370...  | 1        |
| Arabidopsis               | I     | ATREP3                        |       | 16454400                  | 16454520 | d         | 70                             | HELITRON    | 6552          | 3'              | 16461072   | 16461734  | AT1G43666 | c                   | GO:000367...  | 1        |
| Arabidopsis               | I     | ATREP3                        |       | 16998958                  | 16999212 | c         | 71                             | HELITRON    | 3663          | 5'              | 16995113   | 16995295  | AT1G44941 | c                   | GO:000367...  | 1        |
| Arabidopsis               | I     | ATREP3                        |       | 16998958                  | 16999212 | c         | 71                             | HELITRON    | 326           | 3'              | 16999538   | 17001729  | AT1G44960 | d                   | GO:000367...  | 1        |
| Arabidopsis               | I     | ATREP3                        |       | 16999110                  | 16999225 | c         | 65                             | HELITRON    | 3815          | 5'              | 16995113   | 16995295  | AT1G44941 | c                   | GO:000367...  | 1        |
| Arabidopsis               | I     | ATREP3                        |       | 16999110                  | 16999225 | c         | 65                             | HELITRON    | 313           | 3'              | 16999538   | 17001729  | AT1G44960 | d                   | GO:000367...  | 1        |
| Arabidopsis               | I     | ATREP3                        |       | 18281336                  | 18281470 | c         | 66                             | HELITRON    | 358           | 5'              | 18279600   | 18280978  | AT1G49390 | d                   | GO:000002...  | 1        |
| Arabidopsis               | I     | ATREP3                        |       | 18281336                  | 18281470 | c         | 66                             | HELITRON    | 1562          | 3'              | 18283032   | 18284202  | EMB1129   | d                   | GO:000573...  | 1        |
| Arabidopsis               | I     | ATREP3                        |       | 18905797                  | 18905959 | d         | 56                             | HELITRON    | 593           | 5'              | 18902930   | 18905204  | AT1G50990 | d                   | GO:000367...  | 1        |
| Arabidopsis               | I     | ATREP3                        |       | 18905797                  | 18905959 | d         | 56                             | HELITRON    | 3965          | 3'              | 18909924   | 18910142  | AT1G51000 | d                   | GO:0005886    | 1        |
| Arabidopsis               | I     | ATREP3                        |       | 21069812                  | 21069956 | c         | 66                             | HELITRON    | 3959          | 5'              | 21064279   | 21065853  | AT1G56260 | c                   | GO:000551...  | 1        |
| Arabidopsis               | I     | ATREP3                        |       | 21069812                  | 21069956 | c         | 66                             | HELITRON    | 1061          | 3'              | 21071017   | 21071650  | AT1G56270 | c                   | GO:000072...  | 1        |
| Arabidopsis               | I     | ATREP3                        |       | 22782225                  | 22782417 | d         | 70                             | HELITRON    | 837           | 5'              | 22780733   | 22781388  | AT1G61688 | c                   | GO:000039...  | 1        |
| Arabidopsis               | I     | ATREP3                        |       | 22782225                  | 22782417 | d         | 70                             | HELITRON    | 190           | 3'              | 22782607   | 22786859  | AT1G61690 | c                   | GO:000950...  | 1        |
| Arabidopsis               | I     | ATREP5                        |       | 822388                    | 822528   | c         | 59                             | HELITRON    | 1071          | 5'              | 819662     | 821317    | AT1G03340 | d                   | GO:000403...  | 1        |
| Arabidopsis               | I     | ATREP5                        |       | 822388                    | 822528   | c         | 59                             | HELITRON    | 110           | 3'              | 822638     | 824393    | AT1G03350 | c                   | GO:000535...  | 1        |
| Arabidopsis               | I     | ATREP5                        |       | 10920945                  | 10921249 | c         | 71                             | HELITRON    | 268           | 5'              | 10918278   | 10920677  | AT1G30760 | d                   | GO:000367...  | 1        |
| Arabidopsis               | I     | ATREP5                        |       | 10920945                  | 10921249 | c         | 71                             | HELITRON    | 2670          | 3'              | 10923919   | 10926561  | AT1G30780 | c                   | GO:000573...  | 1        |
| Arabidopsis               | I     | ATREP5                        |       | 11408057                  | 11408563 | c         | 61                             | HELITRON    | 1798          | 5'              | 11399607   | 11406259  | AFH14     | c                   | GO:000002...  | 1        |
| Arabidopsis               | I     | ATREP5                        |       | 11408057                  | 11408563 | c         | 61                             | HELITRON    | 2312          | 3'              | 11410875   | 11412204  | ACBP6     | c                   | GO:000377...  | 1        |
| Arabidopsis               | I     | ATREP5                        |       | 11452926                  | 11453079 | c         | 71                             | HELITRON    | 941           | 5'              | 11450460   | 11451985  | NIP3;1    | d                   | GO:000563...  | 1        |
| Arabidopsis               | I     | ATREP5                        |       | 11452926                  | 11453079 | c         | 71                             | HELITRON    | 4047          | 3'              | 11457126   | 11461825  | AT1G31910 | d                   | GO:000681...  | 1        |
| Arabidopsis               | I     | ATREP5                        |       | 12039671                  | 12039823 | d         | 63                             | HELITRON    | 27147         | 5'              | 12010901   | 12012524  | AT1G33120 | d                   | GO:000521...  | 1        |
| Arabidopsis               | I     | ATREP5                        |       | 12039671                  | 12039823 | d         | 63                             | HELITRON    | 6818          | 3'              | 12046641   | 12050066  | AT1G33230 | d                   | GO:000455...  | 1        |
| Arabidopsis               | I     | ATREP5                        |       | 13465796                  | 13465965 | c         | 67                             | HELITRON    | 9465          | 5'              | 13454496   | 13456331  | AT1G36060 | c                   | GO:000367...  | 1        |
| Arabidopsis               | I     | ATREP5                        |       | 13465796                  | 13465965 | c         | 67                             | HELITRON    | 946           | 3'              | 13466911   | 13470936  | AT1G36070 | c                   | GO:000367...  | 1        |

Ortholog TE-Gen couples present in at least  organisms
